# Supplementary material for: A Review of the Health Benefits of Food Enriched with Kynurenic Acid
Source: Nutrients. 2022 Oct 8;14(19):4182. doi: 10.3390/nu14194182 (PMC9570704; doi:10.3390/nu14194182)
Supplement: Supplementary file 1 [file nutrients-14-04182-s001.zip › nutrients-1942370-supplementary.pdf]

**Table S1.** Content of kynurenic acid in human serum

| Kynurenic acid content<br>[μM] | Comment  | Reference |
|--------------------------------|----------|-----------|
| Healthy adults                 |          |           |
| 0.071                          |          | [15]      |
| 0.06                           |          | [16]      |
| 0.045                          |          | [17]      |
| 0.045                          |          | [18]      |
| 0.038                          |          | [19]      |
| 0.032                          |          | [20]      |
| 0.027                          |          | [21]      |
| 0.023                          |          | [22]      |
| 0.017                          | pregnant | [23]      |
| 0.016                          | pregnant | [24]      |
| Healthy children               |          |           |
| 0.018                          |          | [25]      |

**Table S2.** Content of kynurenic acid in human cerebrospinal fluid

| Kynurenic acid content<br>[μM] | Reference |
|--------------------------------|-----------|
| Healthy adults                 |           |
| 0.0017                         | [31]      |
| 0.00098                        | [32]      |
| 0.0009                         | [20]      |
| 0.0028-0.005                   | [33]      |
| 0.001                          | [34]      |
| 0.003 – 0.004                  | [21]      |
| 0.002                          | [16]      |
| 0.001                          | [35]      |
| 0.001                          | [36]      |
| 0.005                          | [37]      |
| Children                       |           |
| ~0.005                         | [38]      |

**Table S3.** Excretion of kynurenic acid in human urine

| Kynurenic acid content in urine                         | Reference | KYNA excretion [mg/day]* |
|---------------------------------------------------------|-----------|--------------------------|
| Adults                                                  |           |                          |
| 22.18 $\mu\text{M}$ (male)                              | [47]      | 6.29 (male)              |
| 17.57 $\mu\text{M}$ (female)                            |           | 4.98 (female)            |
| 19.07 $\mu\text{M}$                                     | [48]      | 5.41                     |
| 18.96 $\mu\text{M}$                                     | [49]      | 5.38                     |
| 13.44 $\mu\text{M}$                                     | [50]      | 3.81                     |
| 13 $\mu\text{M}$                                        | [51]      | 3.69                     |
| 11.7 $\mu\text{M}$                                      | [24]      | 3.32                     |
| 4.69 $\mu\text{M}$                                      | [52]      | 1.33                     |
| 4.04 $\mu\text{M}$                                      | [53]      | 1.14                     |
| 15.9 $\mu\text{mol/day}$                                | [54]      | 3.01                     |
| 11.04 $\mu\text{mol/day}$                               | [55]      | 2.09                     |
| 9.97 $\mu\text{mol/day}$                                | [56]      | 1.88                     |
| 9.3 $\mu\text{mol/day}$                                 | [57]      | 1.76                     |
| 0.74 $\mu\text{M mM}^{-1}\text{ Cr}$                    | [58]      | -                        |
| Children                                                |           |                          |
| age under 14 years; mean age 5 years                    |           |                          |
| 93.12 $\mu\text{M}$ (daytime)                           | [59]      | 14.0-17.6                |
| 74.07 $\mu\text{M}$ (nighttime)                         |           |                          |
| age 5-14 years                                          | [60]      | 2.64 – 3.30              |
| 5.86 – 7.34 $\mu\text{g/mgCr}$                          |           |                          |
| neonates                                                |           |                          |
| 26.4 $\mu\text{g/mL} \times \text{kg}^{\#}$ (nocturnal) | [61]      | -                        |
| 42.2 $\mu\text{g/mL} \times \text{kg}^{\#}$ (diurnal)   |           |                          |
| mean age 37.7 or 44.0 months                            |           |                          |
| 5.5 $\mu\text{g/mL} \times \text{kg}^{\#}$ (nocturnal)  | [62]      | -                        |
| 24.7 $\mu\text{g/mL} \times \text{kg}^{\#}$ (diurnal)   |           |                          |

**Note:** \*The assumption behind the calculations is that adult human excretes 1.5 liters of urine on a daily basis and child excretes 1 liter of urine on a daily basis. <sup>#</sup> The values obtained for each compound (in mg/100 ml urine) were multiplied by 10 and divided by the child's weight (in kg). Thus the results were expressed in mg/ml  $\times$  kg.

**Table S4.** Content of kynurenic acid in food, beverages, herbs and spices for cooking

| Food                         | Kynurenic acid content      | Reference |
|------------------------------|-----------------------------|-----------|
| Multiflorous honey           | 0.8773 µg/g                 | [73]      |
| Bee pollen                   | 0.6455 µg/g                 |           |
| Broccoli                     | 0.4184 µg/g                 |           |
| Buckwheat honey              | 0.1812 µg/g                 |           |
| Linden honey                 | 0.1791 µg/g                 |           |
| Potato                       | 0.1301 µg/g                 |           |
| Cauliflower                  | 0.0473 µg/g                 |           |
| Garlic                       | 0.0276 µg/g                 |           |
| Onion                        | 0.0228 µg/g                 |           |
| Milk 1.5%                    | 0.0174 µg/g                 |           |
| Yoghurt                      | 0.0170 µg/g                 |           |
| Corn                         | 0.0160 µg/g                 |           |
| Bread                        | 0.0147 µg/g                 |           |
| Kefir                        | 0.0107 µg/g                 |           |
| Barley                       | 0.0098 µg/g                 |           |
| Pig liver                    | 0.0091 µg/g                 |           |
| Pea                          | 0.0088 µg/g                 |           |
| Flour                        | 0.0084 µg/g                 |           |
| Hard cheese                  | 0.0084 µg/g                 |           |
| Carrot                       | 0.0073 µg/g                 |           |
| Tomato                       | 0.0059 µg/g                 |           |
| Rice                         | 0.0056 µg/g                 |           |
| Egg                          | 0.0046 µg/g                 |           |
| Cucumber                     | 0.0038 µg/g                 |           |
| Pork                         | 0.0037 µg/g                 |           |
| Beef                         | 0.0031 µg/g                 |           |
| Sunflower oil                | 0.0027 µg/g                 |           |
| Apple                        | 0.0023 µg/g                 |           |
| Colza oil                    | 0.0021 µg/g                 |           |
| Fish (roach)                 | 0.0014 µg/g                 |           |
| Red paprika                  | 0.0012 µg/g                 |           |
| Chestnut honey               | up to 2114.9 µg/g           | [74]      |
| Eucalyptus honey             | 143.4 µg/g                  |           |
| Honeydew honey               | 126.4 µg/g                  |           |
| Sunflower honey              | 125.3 µg/g                  |           |
| Acacia honey                 | 23.1 µg/g                   |           |
| Fungus <i>Suillus luteus</i> | 0.0263 µg/g dry weight      | [75]      |
| Potato                       | up to 0.648 µg/g wet weight | [76]      |
| French fries                 | up to 0.646 µg/g wet weight |           |
| Crisps                       | up to 0.478 µg/g wet weight |           |
| Potato flour                 | 0.035 µg/g wet weight       |           |
| Wheat flour                  | 0.008 µg/g wet weight       |           |
| Basil                        | 14.08 µg/g                  | [77]      |
| Thyme                        | 8.87 µg/g                   |           |
| Marjoram                     | 3.78 µg/g                   |           |
| Curry powder                 | 3.39 µg/g                   |           |

|                     |                    |      |
|---------------------|--------------------|------|
| Herbes de Provence  | 3.20 µg/g          |      |
| Mint                | 3.02 µg/g          |      |
| Oregano             | 2.50 µg/g          |      |
| Savory              | 2.37 µg/g          |      |
| Turmeric            | 1.48 µg/g          |      |
| Sage                | 1.28 µg/g          |      |
| Rosemary            | 1.21 µg/g          |      |
| Cloves              | 1.29 µg/g          |      |
| Tarragon            | 1.04 µg/g          |      |
| Glechoma            | 1.01 µg/g          |      |
| Bay leaf            | 0.91 µg/g          |      |
| Fennel              | 0.80 µg/g          |      |
| Parsley             | 0.76 µg/g          |      |
| Cumin               | 0.64 µg/g          |      |
| Black pepper        | 0.10 µg/g          |      |
| Chestnut honey      | 129 – 601 µg/g     | [13] |
| Pine honey          | 14.2 µg/g          |      |
| Eucalyptus honey    | 11.3 µg/g          |      |
| Sunflower honey     | 1.73 µg/g          |      |
| Fir honey           | 1.06 µg/g          |      |
| Clover honey        | 0.342 - 0.746 µg/g |      |
| Orange honey        | 0.609 µg/g         |      |
| Linden honey        | 0.391 µg/g         |      |
| Buckwheat honey     | 0.329 µg/g         |      |
| Orange honey        | 0.273 µg/g         |      |
| Sulla honey         | 0.222 µg/g         |      |
| Lavender honey      | 0.147 µg/g         |      |
| Thyme honey         | 0.143 µg/g         |      |
| Multiflorous honey  | 0.093 - 0.124 µg/g |      |
| Honeydew honey      | 0.122 µg/g         |      |
| Lucerne honey       | 0.101 µg/g         |      |
| Tea                 | up to 0.087 µg/mL  | [14] |
| Coffee              | up to 0.006 µg/mL  |      |
| Cocoa powder        | up to 4.486 µg/g   | [78] |
| Yoghurt             | up to 0.286 µg/mL  |      |
| Kefir               | up to 0.242 µg/mL  |      |
| Red wine            | up to 0.180 µg/mL  |      |
| White cheese        | up to 0.077 µg/g   |      |
| Beer                | up to 0.052 µg/mL  | [11] |
| Mead                | up to 0.381 µg/mL  |      |
| Wine                | up to 0.109 µg/mL  |      |
| Beer                | up to 0.052 µg/mL  |      |
| Distilled beverages | up to 0.016 µg/mL  |      |
| Wine                | up to 0.065 µg/mL  | [79] |
| Chestnut honey      | 410-1140 µg/g      | [80] |

References presented in the table are arranged chronologically according to the date of publication, so the name of the food product may appear more than once.

**Table S5.** Content of kynurenic acid in medicinal herbs and supplements

| Herb              | Kynurenic acid content | Reference |
|-------------------|------------------------|-----------|
| Peppermint leaf   | 3.82 µg/g dry weight   | [83]      |
| Nettle leaf       | 2.71 µg/g dry weight   |           |
| Birch leaf        | 2.68 µg/g dry weight   |           |
| Horsetail herb    | 2.27 µg/g dry weight   |           |
| Reumaflos tea     | 2.08 µg/g dry weight   |           |
| Elder flower      | 1.73 µg/g dry weight   |           |
| Reumaflex         | 1.66 µg/g dry weight   |           |
| Bean pericarp     | 0.57 µg/g dry weight   |           |
| Willow bark       | 0.26 µg/g dry weight   |           |
| Dandelion root    | 0.05 µg/g dry weight   |           |
| St. John's wort   | 5.06 µg/tablet         | [82]      |
| Broccoli          | 4.76 µg/tablet         |           |
| Lemonbalm         | 2.66 µg/tablet         |           |
| Small-leaved lime | 2.26 µg/tablet         |           |
| Common nettle     | 2.03 µg/tablet         |           |
| Heartsease        | 0.99 µg/tablet         |           |
| Lupulin           | 0.55 µg/tablet         |           |
| Midland hawthorn  | 0.20 µg/tablet         |           |
| Flax              | 0.09 µg/tablet         |           |
| Chamomile         | 0.07 µg/tablet         |           |

**Table S6.** Content of kynurenic acid in human milk and baby food

| <b>Food</b>                   | <b>Kynurenic acid content</b>    | <b>Reference</b> |
|-------------------------------|----------------------------------|------------------|
| Human milk                    | 0.0257 µg/mL                     | [73]             |
| Gerber – vegetables with veal | 0.0148 µg/g                      |                  |
| BoboVita – vegetable soup     | 0.0056 µg/g                      |                  |
| BoboFrut – apple and carrot   | 0.0019 µg/mL                     |                  |
| Gerber-chicken                | 0.0010 µg/g                      |                  |
| Human milk                    | 0.0108 µg/mL                     | [45]             |
|                               | in the 7th day of breastfeeding; |                  |
|                               | 0.0417 µg/mL                     |                  |
|                               | in the 14th day of breastfeeding |                  |
| Human milk                    | from 0.0039 µg/mL                | [46]             |
|                               | in the 3rd day                   |                  |
|                               | to 0.0566 µg/mL                  |                  |
|                               | in 6 months of breastfeeding     |                  |
| Milk baby formulas            | up to 0.0015 µg/mL               |                  |

**Table S7.** Health-related effects of kynurenic acid (KYNA) administration

| Effect/proerties    | Species/tissue                                                                | KYNA treatment<br>(dose, schedule)                   | Reference |
|---------------------|-------------------------------------------------------------------------------|------------------------------------------------------|-----------|
| Antiatherosclerotic | Mice, adult                                                                   | 5 mg/kg/day, intragastric;<br>once a day for 8 weeks | [90]      |
|                     | <i>in vitro</i> ;<br>BAEC line                                                | 0.1 mM                                               | [108]     |
|                     | Mice, female, adult                                                           | 2.5, 5, 10 mg/kg;<br>ip; acute                       | [109]     |
|                     | Mice, male, adult                                                             | 5 mg/kg/day;<br>ip; for 1 month                      | [93]      |
|                     | Mice, male and female,<br>adult<br><i>C. albicans</i> intestinal<br>infection | 5 mg/kg,<br>ip; day 3, 6, 9                          | [94]      |
| Antiinflammatory    | Rats, male, adult                                                             | 300 mg/kg;<br>ip; acute                              | [110]     |
|                     | Rats, male, adult                                                             | 100 mg/kg/h;<br>iv; infusion for 6 h                 | [103]     |
|                     | Rats, male, adult                                                             | 25 mg/kg;<br>iv; acute                               | [111]     |
|                     | Dogs, adult                                                                   | 50 mg/kg;<br>iv; infusion for 30 min in 20 mL        | [102]     |
|                     | Rats, male and female,<br>adult                                               | 10, 50, 100 mg/kg<br>ip; acute                       | [112]     |
| Antimigraine        | Rats, male, adult                                                             | 189.17 mg/kg                                         | [113]     |
|                     | Rats, male, adult                                                             | 300 mg/kg;<br>ip; acute                              | [114]     |
|                     | Rats, male, adult                                                             | 1 mmol/kg<br>(189 mg/kg);<br>ip; acute               | [115]     |
|                     | Mice, adult                                                                   | 5 mg/kg/day, intragastric;<br>once a day for 8 weeks | [90]      |
| Antiobesity         | Mice, male, adult                                                             | 5 mg/kg/day;<br>ip; for 1 month                      | [93]      |
| Antioxidant         | Rat brain homogenates in<br>vitro                                             | 0.1–100 $\mu$ M                                      | [116]     |

|                                  |                                                                               |                                                                                          |       |
|----------------------------------|-------------------------------------------------------------------------------|------------------------------------------------------------------------------------------|-------|
|                                  | Rat brain homogenates<br>and <i>Xenopus laevis</i><br>oocytes <i>in vitro</i> | 0–150 $\mu$ M                                                                            | [116] |
|                                  | Mice, adult                                                                   | 2.5, 25 or 250 mg/L<br>of drinking water for different<br>time periods 3, 7, 14, 28 days | [87]  |
| Antiestrogenic                   | Mice, female                                                                  | 5 mg/kg/day;<br>ip; for 4 weeks                                                          | [97]  |
| Antitumor                        | Mice, male, adult                                                             | 300 mg/kg;<br>ip; acute: once, or twice                                                  | [117] |
| Antidiabetic                     | Rats, adult                                                                   | unknown                                                                                  | [95]  |
| Antiviral<br>(SARS-CoV-2)        | <i>in vitro</i>                                                               | IC <sub>50</sub> = 0.58 $\mu$ M                                                          | [118] |
| Bactericidal effect              | <i>in vitro</i>                                                               | 0.1, 0.5, 2.5 mM                                                                         | [26]  |
|                                  | Rat, adult<br>aorta, ischemia-<br>reperfusion model <i>in vitro</i>           | 0.1 mM                                                                                   | [119] |
| Cardiovascular<br>protection     | Rabbit, adult<br>heart,<br>ischemia/reperfusion<br>model <i>ex vivo</i>       | 20 mg<br>delivered through aortic<br>cannula over 30 sec                                 | [120] |
|                                  | Mice, adult                                                                   | 5 mg/kg/day,<br>intragastric; once a day<br>for 8 weeks                                  | [90]  |
| Cholesterol-<br>lowering         | Mice, male, adult                                                             | 5 mg/kg/day;<br>ip; for 1 month                                                          | [93]  |
| Glucose tolerance<br>improvement | Mice, male, adult                                                             | 5 mg/kg/day;<br>ip; for 1 month                                                          | [93]  |
|                                  | Rats, male, adult                                                             | 500 mg/kg;<br>ip; acute                                                                  | [121] |
| Hepatoprotective                 | C57BL/6J male mice<br>high-fat diet                                           | 2 mg/kg<br>ip; injection every other day<br>for 8 weeks                                  | [122] |
|                                  | Rats, male, adult                                                             | 160 $\mu$ mol/kg<br>(30 mg/kg);<br>ip; acute (2 injections)                              | [99]  |
| Protection against<br>sepsis     | Rats, male, adult                                                             | 160 $\mu$ mol/kg<br>(30 mg/kg);<br>ip; acute (2 injections)                              | [100] |

|                                 |                             |                                                                                            |       |
|---------------------------------|-----------------------------|--------------------------------------------------------------------------------------------|-------|
|                                 | Mice, adult                 | 3x200 mg/kg; 500 mg/kg;<br>sc; acute                                                       | [98]  |
| Multi-organ<br>dysfunction      | Rats, adult                 | 30-100 mg/kg;<br>iv; 4 h before heat stress                                                | [101] |
| Probiotic<br>stimulating effect | <i>in vitro</i>             | 0.0005, 0.005, 0.05, 0.25, 0.5 mM                                                          | [123] |
|                                 | Human, adults               | 0.5% cream;<br>topical application                                                         | [106] |
| Wound healing                   | Rabbits;<br><i>in vitro</i> | 0.5 mg/mL<br>(cream; topical application);<br>0.00625-0.15 mg/mL (medium<br>concentration) | [104] |
|                                 | Rabbits                     | 1% eye drops                                                                               | [105] |

---

**Table S8.** Clinical trials designed to investigate the kynurenic acid (KYNA) effect registered in ClinicalTrials.gov database

| Study title                                                                                             | Goal / intervention                                                                                                                                                                                                                             | Study identifier |
|---------------------------------------------------------------------------------------------------------|-------------------------------------------------------------------------------------------------------------------------------------------------------------------------------------------------------------------------------------------------|------------------|
| FS2 Safety and tolerability study in healthy volunteers                                                 | Aim of study is to evaluate the safety and tolerability of KYNA cream applied to the skin of healthy human subjects                                                                                                                             | NCT02340325      |
| Pilot study investigating a restorative wound care cream together with petrolatum on surgical excisions | Objective of this pilot study is to investigate the safety and effectiveness of a new wound care product containing KYNA formulated to improve healing outcome, minimize complications of impaired healing and minimize the appearance of scars | NCT04169438      |
| A clinical study investigating the effectiveness of OTC scar-management modalities                      | Phase II prospective, randomized, double-blind, placebo controlled and comparative clinical study evaluating hydrogel scar-management modalities for effective management of hyperproliferative scars and keloids                               | NCT04169490      |
| Clinical safety and scar prevention study of a topical antifibrotic compound FS2                        | Study investigates the safety and effectiveness of daily post-surgical scar management, using a moisture-balancing base product containing different amounts of KYNA                                                                            | NCT04186273      |

**Table S9.** Patents and patent applications claiming medical uses of kynurenic acid (KYNA)

| Patent title                                                                                                                                          | Claimed use of kynurenic acid                                                                                                                                                                            | Patent identifier / priority date |
|-------------------------------------------------------------------------------------------------------------------------------------------------------|----------------------------------------------------------------------------------------------------------------------------------------------------------------------------------------------------------|-----------------------------------|
| Application of kynurenic acid in improving hyperlipidemia induced dyslipidemia, obesity and intestinal flora disorder                                 | Application of KYNA in preparations for improving high-fat diet induced dyslipidemia, obesity and intestinal flora disorder                                                                              | CN112168822A<br>2020-09-27        |
| Composition for preventing or treating fatty liver disease comprising kynurenic acid                                                                  | Pharmaceutical composition for the treatment or prevention of fatty liver disease comprising KYNA                                                                                                        | KR20220005948A<br>2020-07-07      |
| Methods for preventing and treating retinal damage                                                                                                    | Method of treating, reducing the risk of, preventing, or alleviating at least one symptom of a retinal disease, injury or condition comprises a loss of retinal ganglion cells by administration of KYNA | US20210299114A1<br>2020-03-30     |
| Compositions for use in the reduction of nociception and other health benefits in infants and adults                                                  | Nutritional composition promoting health benefits by increasing KYNA production by microbiota                                                                                                            | WO2021116282A1<br>2019-12-11      |
| Strontium based compositions and formulations for pain, pruritus, and inflammation                                                                    | Composition containing strontium and KYNA for topical use for use in a method of treating chronic pruritus, pain, or inflammation                                                                        | US20220054535A1<br>2018-12-21     |
| Pharmaceutical composition based on kynurenic acid and its use in the prevention or reduction of overweight or obesity, and use of kynurenic acid     | Pharmaceutical composition based on KYNA for the prevention of weight gain, overweight and obesity                                                                                                       | PL427801A1<br>2018-11-16          |
| Application of kynurenic acid or derivative thereof in preparing drug for improving pathological damages associated with chronic psychological stress | Use of KYNA for improving pathological injuries related to chronic mental stress                                                                                                                         | WO2020088270 A1<br>2018-10-29     |
| New medical use of kynurenic acid and its salts in the treatment of the conjunctiva and cornea of the eye                                             | Subject of the application is the medical use of KYNA, which inhibits the excessive growth of the conjunctival epithelium and the abnormal reconstruction of the eye conjunctiva                         | PL425606A1<br>2018-05-17          |
| The use of kynurenic acid to reduce weight gain                                                                                                       | Use of KYNA in subjects at risk of overweight and obesity, especially in the period of development and adolescence, for the prevention of overweight and obesity                                         | PL239745B1<br>2017-01-17          |

|                                                                                                                                                                                                   |                                                                                                                                                                                                                                                                                                                                 |                              |
|---------------------------------------------------------------------------------------------------------------------------------------------------------------------------------------------------|---------------------------------------------------------------------------------------------------------------------------------------------------------------------------------------------------------------------------------------------------------------------------------------------------------------------------------|------------------------------|
| The use of kynurenic acid and its salts in the treatment of diseases with an accelerated heart rate and the prevention of heart disease                                                           | Use of KYNA in the treatment of diseases with an accelerated heart rate and the prevention of heart diseases                                                                                                                                                                                                                    | PL234304B1<br>2016-12-07     |
| Composition comprising kynurenic acid for relieving hangover                                                                                                                                      | Composition containing KYNA for relieving hangover                                                                                                                                                                                                                                                                              | KR101845704B1<br>2016-10-27  |
| Use of kynurenic acid for treating muscle atrophy                                                                                                                                                 | KYNA for use as a medicament intended for increasing and/or maintaining muscle mass and/or power in a mammal                                                                                                                                                                                                                    | EP3506901B1<br>2016-09-05    |
| Methods to reduce harmful effects of smoking cigarettes, cigars and tobacco, and of exposure to smoke from cigarettes, cigars and tobacco by using kynurenic acid in nanoparticle carrier systems | Method to reduce the harmful effects of smoking cigarettes, cigars, and tobacco, and exposure to smoke from the smoking cigarettes, cigars and tobacco characterized in that KYNA in a nanoparticle carrier system is added to the cigarettes, cigars or tobacco                                                                | WO2017217877A1<br>2016-06-15 |
| Medical use of kynurenic acid and its salts for the treatment of urolithiasis                                                                                                                     | KYNA for use in the prevention or treatment of urolithiasis in the human and animal body                                                                                                                                                                                                                                        | PL233551B1<br>2014-12-19     |
| Kynurenic acid for the treatment of disturbances in the body's water and electrolyte balance                                                                                                      | KYNA for use in the treatment of disorders of the body's water and electrolyte balance, preferably for the treatment and prophylaxis of diseases associated with excessive accumulation of fluid in the tissues                                                                                                                 | PL226845B1<br>2013-12-13     |
| Anti-fibrogenic compounds, methods and uses thereof                                                                                                                                               | Use of KYNA for treating fibrotic disease                                                                                                                                                                                                                                                                                       | US9737523B2<br>2013-06-05    |
| The use of kynurenic acid in drug and medicine                                                                                                                                                    | Use of KYNA, characterized in that it is used in dietetics and medicaments, in particular in rheumatic diseases                                                                                                                                                                                                                 | PL226971B1<br>2009-05-15     |
| Novel medical use of kynurenic acid, its precursors and derivatives                                                                                                                               | Use of KYNA in manufacturing of a drug used in prevention and therapy of pancreas disorders characterized by edema and/or vacuolization and/or destruction of pancreatic tissue and/or pancreas necrosis leading to release of pancreatic $\alpha$ -amylase                                                                     | WO2010110689A1<br>2009-03-23 |
| Use of kynurenic acid and derivatives thereof in the treatment of conditions of the gastrointestinal tract accompanied by hypermotility and inflammation or gout or multiple sclerosis            | Use of KYNA in the manufacture of a medicament for the treatment of conditions characterized by pathophysiological conditions of the gastrointestinal tract accompanied by increased motility and an elevated activity of the enzyme xanthine oxidoreductase (XOR), and further for the treatment of gout or multiple sclerosis | WO2008087461B1<br>2007-01-17 |

|                                                                                         |                                                                                                                                                                                                                                                                                 |                              |
|-----------------------------------------------------------------------------------------|---------------------------------------------------------------------------------------------------------------------------------------------------------------------------------------------------------------------------------------------------------------------------------|------------------------------|
| Kynurenic acid and salts thereof for the prevention and treatment of shock              | Use of KYNA for preparing drugs effective in the prevention and treatment of shock, in particular septic shock                                                                                                                                                                  | WO2006117624A2<br>2005-04-29 |
| Treatment of neurological diseases by increasing brain concentrations of kynurenic acid | Method for treating KYNA neurological disease in an individual comprising administering a metabolic precursor of kynurenic acid                                                                                                                                                 | US6265442B1<br>2001-07-24    |
| EAA antagonists as anti-emetic drugs                                                    | Use of KYNA for suppressing emesis mediated by activation of excitatory amino acid receptors on the surfaces of neurons in brain regions accessible to blood-borne molecules that do not freely penetrate blood-brain barriers comprising administering to a susceptible mammal | US5039528A<br>1989-12-11     |
| Kynurenic acid in neurodegenerative disorders                                           | Use of KYNA for the preparation of medicament useful for the prevention or treatment of neurodegenerative disorders                                                                                                                                                             | IE882452L<br>1988-08-11      |

---

**Table S10.** Estimated daily intake of kynurenic acid as an ingredient of food

| Diet composition                  |                     | Kynurenic acid daily intake [mg] |       |          |
|-----------------------------------|---------------------|----------------------------------|-------|----------|
|                                   |                     | low                              | high  | average* |
| Meat,<br>vegetables,<br>beverages | no honey            | 0.053                            | 0.076 | 0.065    |
|                                   | with chestnut honey | 0.325                            | 41.3  | 20.81    |

\*Average value was calculated as a mean of low intake and high intake values. Calculations presented are based on data derived from following Tables: S10-S13.

**Table S11.** Intake of kynurenic acid in vegetables

|                                           | Group of vegetables* |        |             |       | 1 serving | Kynurenic acid**<br>[μg] |             |
|-------------------------------------------|----------------------|--------|-------------|-------|-----------|--------------------------|-------------|
|                                           | green                | yellow | cruciferous | other |           | low intake               | high intake |
| Equally mixed portion [g]                 | 20                   | 20     | 20          | 20    | 80        |                          |             |
| Kynurenic acid content per 1 serving [μg] | 0.04                 | 0.09   | 1.25        | 0.03  | 1.4       | 4.2                      | 14          |
| Green predominantly portion [g]           | 40                   | 13     | 13          | 13    | 80        |                          |             |
| Kynurenic acid content per 1 serving [μg] | 0.08                 | 0.06   | 0.8         | 0.02  | 0.95      | 2.8                      | 9.5         |
| Yellow predominantly portion (g)          | 13                   | 40     | 13          | 13    | 80        |                          |             |
| Kynurenic acid content per 1 serving [μg] | 0.02                 | 0.18   | 0.8         | 0.02  | 1.01      | 3                        | 10          |
| Cruciferous predominantly portion [g]     | 13                   | 13     | 40          | 13    | 80        |                          |             |
| Kynurenic acid content per 1 serving [μg] | 0.02                 | 0.06   | 2.5         | 0.02  | 2.6       | 9.5                      | 26          |

\*Allocation of vegetables in accordance with color classification of fruit and vegetables. Low intake was established as consumption of three or fewer servings per week. High intake response to upper quartile or quintile was established as consumption of more than 10 servings per week. The mean portion was established based on data describing specificity of meal composition declared in various countries [124].

\*\*For all specific kinds of vegetables, the mean amount of KYNA was calculated based on our recent analysis [73].

Mean kynurenic acid content in various vegetables was calculated from previously published data (for references see Table S4). The predominant consumption of various vegetable types was suggested as consumption of about 50% more than calculated in equally mixed vegetable portion.

**Table S12.** Intake of kynurenic acid in meat, dairy, egg and beverages

| Category  | Food         | Kynurenic acid<br>content*<br>[mg/g] | Daily intake<br>[g or mL] | Daily intake of<br>kynurenic acid<br>[mg] |
|-----------|--------------|--------------------------------------|---------------------------|-------------------------------------------|
| Meat      | Fish (roach) | 0.000001                             | 150                       | 0.0002                                    |
|           | Beef         | 0.000003                             | 150                       | 0.0005                                    |
|           | Pork         | 0.000004                             | 150                       | 0.0005                                    |
|           | Pig liver    | 0.000009                             | 150                       | 0.0014                                    |
| Dairy     | Milk 1.5%    | 0.00002                              | 200                       | 0.0035                                    |
|           | Kefir        | 0.00024                              | 150                       | 0.0363                                    |
|           | Yoghurt      | 0.00029                              | 100                       | 0.0287                                    |
|           | White cheese | 0.00008                              | 100                       | 0.0077                                    |
|           | Hard cheese  | 0.00001                              | 100                       | 0.0008                                    |
| Egg       | Egg          | 0.000005                             | 56                        | 0.0003                                    |
| Beverages | Tea          | 0.00009                              | 500                       | 0.0435                                    |
|           | Coffee       | 0.00001                              | 150                       | 0.0009                                    |
|           | Wine         | 0.00018                              | 500                       | 0.0359                                    |
|           | Beer         | 0.000005                             | 200                       | 0.0026                                    |

\*highest reported in the literature (see for details and references Table S4).

**Table S13.** Intake of kynurenic acid in single and daily dose of honey

| Honey            | Single dose [g] | Daily dose [g] | Content of kynurenic acid in honey [µg/gram] | Intake of kynurenic acid in single dose [mg] | Intake of kynurenic acid in daily dose [mg] |
|------------------|-----------------|----------------|----------------------------------------------|----------------------------------------------|---------------------------------------------|
| Chestnut honey   | 20              | 60             | 550                                          | 11                                           | 33.00                                       |
| Pine honey       | 20              | 60             | 14.2                                         | 0.28                                         | 0.85                                        |
| Eucaliptus honey | 20              | 60             | 11.3                                         | 0.23                                         | 0.68                                        |
| Sunflower honey  | 20              | 60             | 1.73                                         | 0.03                                         | 0.10                                        |
| Buckwheat honey  | 20              | 60             | 0.33                                         | 0.007                                        | 0.02                                        |
| Chestnut honey   |                 | 75             | 550                                          |                                              | 41.25                                       |
| Pine honey       |                 | 75             | 14.2                                         |                                              | 1.07                                        |
| Eucalyptus honey |                 | 75             | 11.3                                         |                                              | 0.85                                        |
| Sunflower honey  |                 | 75             | 1.73                                         |                                              | 0.13                                        |
| Buckwheat honey  |                 | 75             | 0.33                                         |                                              | 0.02                                        |

Single dose and daily dose of honey according to: <https://www.rxlist.com/honey/supplements.htm>.  
Content of kynurenic acid in honey according to Turski et al., 2016 [13].

**Table S14.** Effects of chestnut honey established in animals, *in vitro* and biochemical studies

| Subject                                             |      | Treatment                                                                                                                                                                                                                                                                                     | Effect                                                                                                                                                                                                                                                                                                                                                                                                                                                                                                                                          | Reference |
|-----------------------------------------------------|------|-----------------------------------------------------------------------------------------------------------------------------------------------------------------------------------------------------------------------------------------------------------------------------------------------|-------------------------------------------------------------------------------------------------------------------------------------------------------------------------------------------------------------------------------------------------------------------------------------------------------------------------------------------------------------------------------------------------------------------------------------------------------------------------------------------------------------------------------------------------|-----------|
| Animal studies                                      |      |                                                                                                                                                                                                                                                                                               |                                                                                                                                                                                                                                                                                                                                                                                                                                                                                                                                                 |           |
| Four-week-old C57BL/6J mice                         | male | HFD supplemented with Sicilian black bee chestnut honey for 16 weeks; dose of honey: 45 mg honey ingested/day/mouse                                                                                                                                                                           | <ul style="list-style-type: none"> <li>attenuation of obesity-related peripheral and central insulin resistance</li> <li>improvement of glucose metabolism in HFD mice</li> <li>mitigation of neurodegeneration induced by HFD</li> <li>prevention of increase in pro-apoptotic gene expressions, such as Fas-L and p-27, and decrease in anti-apoptotic genes, such as Bcl-2 and BDNF caused by HFD</li> <li>improvement of insulin signaling in brains of HFD mice</li> <li>modification of blood levels of leptin and adiponectin</li> </ul> | [127]     |
| Male rats HCl/ethanol-induced gastric ulcers        |      | HCl/ethanol-induced gastric ulcers; dose of honey: 1.25 and 2.5 g/kg; orally for three consecutive days                                                                                                                                                                                       | <ul style="list-style-type: none"> <li>prevention</li> <li>ulcer preventive index dose 1.25 g/kg – 11.4% dose 2.5 g/kg – 77.1%</li> </ul>                                                                                                                                                                                                                                                                                                                                                                                                       | [128]     |
| Adult female Sprague Dawley rats weighing 250–300 g |      | CCl <sub>4</sub> –induced liver damage; dose of honey: 400 mg/kg; gavage for 7 days                                                                                                                                                                                                           | <ul style="list-style-type: none"> <li>enhanced healing of CCl<sub>4</sub>-induced liver damage</li> </ul>                                                                                                                                                                                                                                                                                                                                                                                                                                      | [129]     |
| New Zealand White female rabbits                    |      | Four 1.5 cm x 1.5 cm full-thickness skin wounds were created on the back of each animal and treated with pure honey or sterile saline, respectively; wounds were assessed by wound measurements and collection of samples at 7, 14, and 21 days post wounding to evaluate the healing process | <ul style="list-style-type: none"> <li>increased formation of granulation tissue, epithelization, angiogenesis, and fibroplasia levels increased in the honey-treated groups</li> </ul>                                                                                                                                                                                                                                                                                                                                                         | [130]     |
| Rats                                                |      | Alkaline burn on cornea; 0.05% chestnut honey eye drops four times a day for 14 days                                                                                                                                                                                                          | <ul style="list-style-type: none"> <li>better corneal healing after treatment with chestnut honey containing eye drops concerning corneal healing sore and <math>\alpha</math>4<math>\beta</math>1 integrin staining</li> </ul>                                                                                                                                                                                                                                                                                                                 | [131]     |
| <i>in vitro</i> studies                             |      |                                                                                                                                                                                                                                                                                               |                                                                                                                                                                                                                                                                                                                                                                                                                                                                                                                                                 |           |
| Breast cancer, MCF7, SKBR3, MDAMB-231,              |      | <i>in vitro</i> concentration of honey: 1, 2.5, 5, 7.5, and 10 mg/mL                                                                                                                                                                                                                          | <ul style="list-style-type: none"> <li>chestnut honey induced cytotoxicity over 50% on all the cell lines, including the control</li> </ul>                                                                                                                                                                                                                                                                                                                                                                                                     | [132]     |

|                                                                                                                                                                                             |                                                                                          |                                                                                                                                                                                                                                                                                                                                                                         |       |
|---------------------------------------------------------------------------------------------------------------------------------------------------------------------------------------------|------------------------------------------------------------------------------------------|-------------------------------------------------------------------------------------------------------------------------------------------------------------------------------------------------------------------------------------------------------------------------------------------------------------------------------------------------------------------------|-------|
| fibrocystic breast epithelial cell line; MCF10A as control                                                                                                                                  |                                                                                          | <ul style="list-style-type: none"> <li>MCF10A cells, even with low doses starting from 1 mg/mL</li> <li>chestnut honey displayed remarkably cytotoxic effect on breast cancer cell lines, MCF7, SKBR3, and even on the most aggressive MDAMB 231, representing the triple negative breast cancer, which lacks of targeted anticancer therapy</li> </ul>                 |       |
| Enzyme isolated from rat liver microsomes                                                                                                                                                   | <i>in vitro</i><br>effective IC <sub>50</sub> concentration: 41.60 µg/mL                 | <ul style="list-style-type: none"> <li>inhibition of monoamine oxidase (MAO)</li> </ul>                                                                                                                                                                                                                                                                                 | [133] |
| Urease and xanthine oxidase activity, antioxidant capacities determined using total phenolic content, ferric reducing antioxidant power (FRAP), and DPPH radical scavenging activity assays |                                                                                          | <ul style="list-style-type: none"> <li>xanthine oxidase IC<sub>50</sub>: 0.028–0.039 g/mL</li> <li>urease IC<sub>50</sub>: 0.010–0.034 g/mL</li> <li>total phenolics IC<sub>50</sub>: 38.9–65.3 mg GAE/100 g sample</li> <li>FRAP IC<sub>50</sub>: 3.11–4.69 µmol FeSO<sub>4</sub> x7H<sub>2</sub>O/g sample</li> <li>DPPH-SC<sub>50</sub>: 35.1–41.35 mg/mL</li> </ul> | [134] |
| <i>Staphylococcus aureus</i> and <i>Escherichia coli</i>                                                                                                                                    | <i>in vitro</i>                                                                          | antibacterial properties                                                                                                                                                                                                                                                                                                                                                | [135] |
| <i>Escherichia coli</i> , <i>Pseudomonas aeruginosa</i> , <i>Enterococcus faecalis</i> , <i>Staphylococcus aureus</i>                                                                       | <i>in vitro</i><br>monofloral Etna <i>Castanea sativa</i> Miller honeys                  | <ul style="list-style-type: none"> <li>antioxidant, NO scavengers, DPPH, FRAP and antimicrobial properties;</li> <li>high antioxidant capacity against free radical species, including reactive oxygen species and peroxy nitrite radical;</li> <li>DPPH and FRAP values confirm good antioxidant activity of chestnut honey</li> </ul>                                 | [136] |
| Biochemical studies                                                                                                                                                                         |                                                                                          |                                                                                                                                                                                                                                                                                                                                                                         |       |
| Analytical assays                                                                                                                                                                           | antioxidant and cytotoxic properties                                                     | utility of honey addition to potentiate the antioxidant and cytoprotective properties of medicinal plant based infusions                                                                                                                                                                                                                                                | [137] |
| Analytical study                                                                                                                                                                            | antihyaluronidase, antiurease, antioxidant, antimicrobial and physicochemical properties | comparative study                                                                                                                                                                                                                                                                                                                                                       | [138] |

|                  |                                                                                 |                   |       |
|------------------|---------------------------------------------------------------------------------|-------------------|-------|
| Analytical study | physico-chemical properties,<br>antioxidant capacities and<br>phenolic profiles | comparative study | [139] |
| Analytical study | physico-chemical properties                                                     | comparative study | [140] |
| Analytical study | nutritional value and<br>antioxidant activity of<br>honeys                      | comparative study | [141] |

---
